# Supplementary material for: Robust electrocatalysts from metal doped W18O49 nanofibers for hydrogen evolution
Source: Royal Society of Chemistry journal article supplement (doi:10.1039/c7cc01249g), 2017-01-01
Supplement: c7cc01249g1.pdf [file c7cc01249g1.pdf]

# Robust Electrocatalysts from Metal Doped $W_{18}O_{49}$ Nanofibers for High-Efficiency Hydrogen Evolution

Yuanyuan Zhao, Qunwei Tang\*, Peizhi Yang, and Benlin He

\*Email address: tangqunwei@ouc.edu.cn; Tel: (86) 532-66782533.

## Experimental Section

**Materials:**  $WCl_5$  and  $PdCl_2$  were purchased from Aladdin. Pt/C (20 wt% Pt) was purchased from Johnson Matthey. Nafion solution (5 wt%) was purchased from Sigma-Aldrich. All chemicals were used as received without any further purification.

**Synthesis of  $W_{18}O_{49}$  Nanostructures:**  $W_{18}O_{49}$  NFs, NFBs and MSs were prepared by dissolving 0.1, 0.17 and 0.5 g of  $WCl_6$  in 50 mL ethanol, which was then transferred into a Teflon-lined autoclave. After being heated at 180 °C for 24 h, the mixture was cooled to room temperature naturally. The product was subsequently collected by centrifugation and washed repeatedly with water and ethanol. Finally, the samples were dried under vacuum at 45 °C overnight. Pd doped  $W_{18}O_{49}$  NFs were synthesized by the same facile and template-free solvothermal method. In details, the solution was prepared by dissolving 0.1g  $WCl_6$  and stoichiometric  $PdCl_2$  (0.22 mg for 1 at% Pd doped  $W_{18}O_{49}$  NFs, 1.12 mg for 5 at% Pd doped  $W_{18}O_{49}$  NFs, and 2.24 mg for 10 at% Pd doped  $W_{18}O_{49}$  NFs) in 50 mL ethanol. The subsequent procedures are identical to the aforementioned preparation process of  $W_{18}O_{49}$  NFs, NFBs and MSs.

**Fabrication of Electrodes:** Catalyst ink was prepared by dispersing 5 mg of catalyst into 990  $\mu$ L of isopropanol containing 10  $\mu$ L of 5 wt% Nafion, which was then sonicated for 30 min. Finally, 5  of the catalyst ink was loaded onto a glassy carbon electrode (GCE) of 3 mm in diameter. The

electrocatalyst loading amount was controlled at 0.35 mg cm<sup>-2</sup> for each catalytic electrode.

**Electrochemical Characterizations:** All electrochemical measurements were conducted on a CHI660E electrochemical workstation in a typical three-electrode setup, which comprising an Ag/AgCl reference electrode, a counter electrode (CE) composed of a Pt sheet, and a working electrode of GCE supported catalyst. The polarization curves were recorded with a linear sweep voltammetry (LSV) mode and at a scan rate of 1 mV s<sup>-1</sup> in 0.5 M H<sub>2</sub>SO<sub>4</sub> aqueous solution. Tafel plots were also obtained under the same conditions. Onset overpotentials were determined according to the beginning of the linear regime in the Tafel plots. Electrochemical impedance spectroscopy (EIS) measurements were conducted in the frequency range of 10<sup>6</sup> Hz ~ 10<sup>-2</sup> Hz. The long-term stability was tested at  $\eta = 503$  mV in 0.5 M H<sub>2</sub>SO<sub>4</sub> aqueous solution. In all measurements, the Ag/AgCl reference electrode was calibrated with respect to reversible hydrogen electrode (RHE). In 0.5 M H<sub>2</sub>SO<sub>4</sub>,  $E_{\text{RHE}} = E_{\text{Ag/AgCl}} + 0.197\text{V}$ . Due to the effects from ohmic resistance, the as-measured currents cannot demonstrate the intrinsic charge-transfer behaviors of catalytic electrodes. To address this issue, an iR compensation has been applied to all electrochemical characterizations. When the UV/Vis/NIR absorption spectra was tested, the concentrations of all target solutions were controlled at 0.01 mg/mL

**Other Characterizations:** The scanning electron microscopy (SEM) images were obtained on SU8010 and S4800. Transmission electron microscopy (TEM) images were obtained on Tecnai G2 F20 FEI instruments. X-ray diffraction (XRD) data were obtained on BRUCKER D8 Advance with Cu K $\alpha$  radiation ( $\lambda = 1.5418 \text{ \AA}$ ). The BET surface area, pore volume, and pore size were measured on a ASAP 2020 at liquid N<sub>2</sub> temperature. X-ray Photoelectron Spectroscopy (XPS) spectra were recorded with a Thermo Scientific Escalab 250 Xi.

## Supporting Tables and Figures

**Table S1.** Structural parameters of pristine  $W_{18}O_{49}$  NFs, 1, 5 and 10 at% Pd doped  $W_{18}O_{49}$  NFs obtained from XRD patterns.

| Electrode materials                | $\beta$ (°) | $2\theta$ (°) | Crystallite size (nm) | $\Delta d/d$ |
|------------------------------------|-------------|---------------|-----------------------|--------------|
| Pristine $W_{18}O_{49}$ NFs        | 0.45        | 23.47         | 17.84                 | 0.009        |
| 1 at% Pd doped $W_{18}O_{49}$ NFs  | 0.53        | 23.46         | 15.15                 | 0.011        |
| 5 at% Pd doped $W_{18}O_{49}$ NFs  | 0.59        | 23.43         | 13.61                 | 0.012        |
| 10 at% Pd doped $W_{18}O_{49}$ NFs | 0.55        | 23.45         | 14.60                 | 0.011        |

**Table S2.** A comparison of HER performances for various electrode materials in acid media. Onset  $\eta$  refers to onset overpotential;  $j$  is the current density,  $\eta$  is the corresponding overpotential at  $j$ ,  $b$  is the Tafel slope and  $j_0$  is the exchange current density.

| Electrode materials                                 | Onset $\eta$ /mV | $j$ /mA cm <sup>-2</sup> | $\eta$ at the corresponding $j$ /mV | $b$ /mV dec <sup>-1</sup> | $j_0$ /mA cm <sup>-2</sup> | Ref.      |
|-----------------------------------------------------|------------------|--------------------------|-------------------------------------|---------------------------|----------------------------|-----------|
|                                                     |                  | 10                       | 552                                 |                           |                            |           |
| W <sub>18</sub> O <sub>49</sub> MSs                 | 227              | 50                       | 656                                 | -                         | -                          |           |
|                                                     |                  | 100                      | 789                                 |                           |                            |           |
|                                                     |                  | 10                       | 530                                 |                           |                            |           |
| W <sub>18</sub> O <sub>49</sub> NFBs                | 119              | 50                       | 643                                 | -                         | -                          |           |
|                                                     |                  | 100                      | 754                                 |                           |                            |           |
|                                                     |                  | 10                       | 425                                 |                           |                            |           |
| W <sub>18</sub> O <sub>49</sub> NFs                 | 110              | 50                       | 587                                 | 54                        | 1.90×10 <sup>-3</sup>      |           |
|                                                     |                  | 100                      | 678                                 |                           |                            | This work |
|                                                     |                  | 10                       | 331                                 |                           |                            |           |
| 1 at% Pd doped W <sub>18</sub> O <sub>49</sub> NFs  | 93               | 50                       | 481                                 | -                         | -                          |           |
|                                                     |                  | 100                      | 605                                 |                           |                            |           |
|                                                     |                  | 10                       | 137                                 |                           |                            |           |
| 5 at% Pd doped W <sub>18</sub> O <sub>49</sub> NFs  | 65               | 50                       | 288                                 | 35                        | 2.36×10 <sup>-3</sup>      |           |
|                                                     |                  | 100                      | 406                                 |                           |                            |           |
|                                                     |                  | 10                       | 164                                 |                           |                            |           |
| 10 at% Pd doped W <sub>18</sub> O <sub>49</sub> NFs | 72               | 50                       | 361                                 | -                         | -                          |           |
|                                                     |                  | 100                      | 522                                 |                           |                            |           |
| MoP-CA2 (Mo:P:citric acid=1:1:2)                    | 40               | 2                        | 84                                  | 54                        | 0.086                      | 1         |

|                                                                                                     |         |     |      |       |                      |    |
|-----------------------------------------------------------------------------------------------------|---------|-----|------|-------|----------------------|----|
|                                                                                                     |         | 10  | 125  |       |                      |    |
|                                                                                                     |         | 100 | 200  |       |                      |    |
| WS <sub>2</sub> nanoflakes                                                                          | 100     | -   | -    | 48    | -                    | 2  |
| nitrogen-enriched carbon-encapsulated cobalt nanoparticles dispersed on graphene sheets             | 70      | 10  | 265  | 98    | -                    | 3  |
| double-gyroid MoS <sub>2</sub> /fluorine-doped tin oxide                                            | 150-200 | 2   | 190  | 50    | 6.9×10 <sup>-4</sup> | 4  |
| defect-rich MoS <sub>2</sub>                                                                        | 120     | 13  | 200  | 50    | 8.9×10 <sup>-3</sup> | 5  |
| NiMoN <sub>x</sub> /C                                                                               | 78      | 5   | 220  | 35.9  | 0.24                 | 6  |
| Core-shell MoO <sub>3</sub> -MoS <sub>2</sub> nanowires on fluorine-doped tin oxide                 | 150-200 | 10  | 310  | 50-60 | 8.2×10 <sup>-5</sup> | 7  |
| cobalt-embedded nitrogen-rich carbon nanotubes                                                      | 50      | 1   | 140  | 69    | 0.01                 | 8  |
|                                                                                                     |         | 10  | 260  |       |                      |    |
| FeP nanosheets                                                                                      | 100     | 10  | ~240 | 67    | -                    | 9  |
| Mixed Close-Packed Cobalt Molybdenum Nitrides (Co <sub>0.6</sub> Mo <sub>1.4</sub> N <sub>2</sub> ) | -       | 10  | 200  |       | 0.23                 | 10 |
| monolayer Pt/Au nanofilm/Ni foam                                                                    | 40      | 70  | 400  | 53    | -                    | 11 |
|                                                                                                     |         | 10  | 95   |       |                      |    |
| Co <sub>2</sub> P/Ti                                                                                | -       | 20  | 109  | 45    | -                    | 12 |
|                                                                                                     |         | 51  | 200  |       |                      |    |
| MoS <sub>2</sub> /tetracyanoquinodimethane/carbon cloth                                             | -       | 209 | 300  | 40    | -                    | 13 |
| self-supported nanoporous cobalt phosphide nanowire arrays on carbon cloth                          | 38      | 10  | 67   |       |                      |    |
|                                                                                                     |         | 20  | 100  | c51   | 0.288                | 14 |
|                                                                                                     |         | 100 | 204  |       |                      |    |

|                                                                |         |    |     |      |                      |    |
|----------------------------------------------------------------|---------|----|-----|------|----------------------|----|
| MoS <sub>3</sub> particles                                     | 100     | 2  | 190 | 54   | $6.3 \times 10^{-4}$ | 15 |
| WS <sub>2</sub> /Reduced Graphene Oxide                        | 150-200 | 23 | 300 | 58   | -                    | 16 |
| CoSe <sub>2</sub> nanobelts                                    | 50      | -  | -   | 48   | $8.4 \times 10^{-3}$ | 17 |
| Carbon-supported molybdenum nitride nanosheets                 | 157     | 2  | 290 | 54.5 | $3.6 \times 10^{-2}$ | 18 |
| molybdenum sulfide films deposited on fluorine-doped tin oxide | 120     | 2  | 170 | 40   | $1.3 \times 10^{-4}$ | 19 |

**Table S3.** The low-frequency  $R_{ct}$  and electron lifetime ( $\tau$ ) for 5 at% Pd doped  $W_{18}O_{49}$  NFs electrode at various HER overpotentials.

| Overpotentials (mV)    | 65     | 100  | 150   | 200   | 300  |
|------------------------|--------|------|-------|-------|------|
| $R_{ct}$ (ohm $cm^2$ ) | 66.5   | 28.8 | 10.6  | 4.4   | 1.2  |
| $f$                    | 0.0825 | 0.1  | 0.215 | 0.562 | 1.78 |
| $\tau$ (s)             | 1.93   | 1.59 | 0.74  | 0.28  | 0.09 |

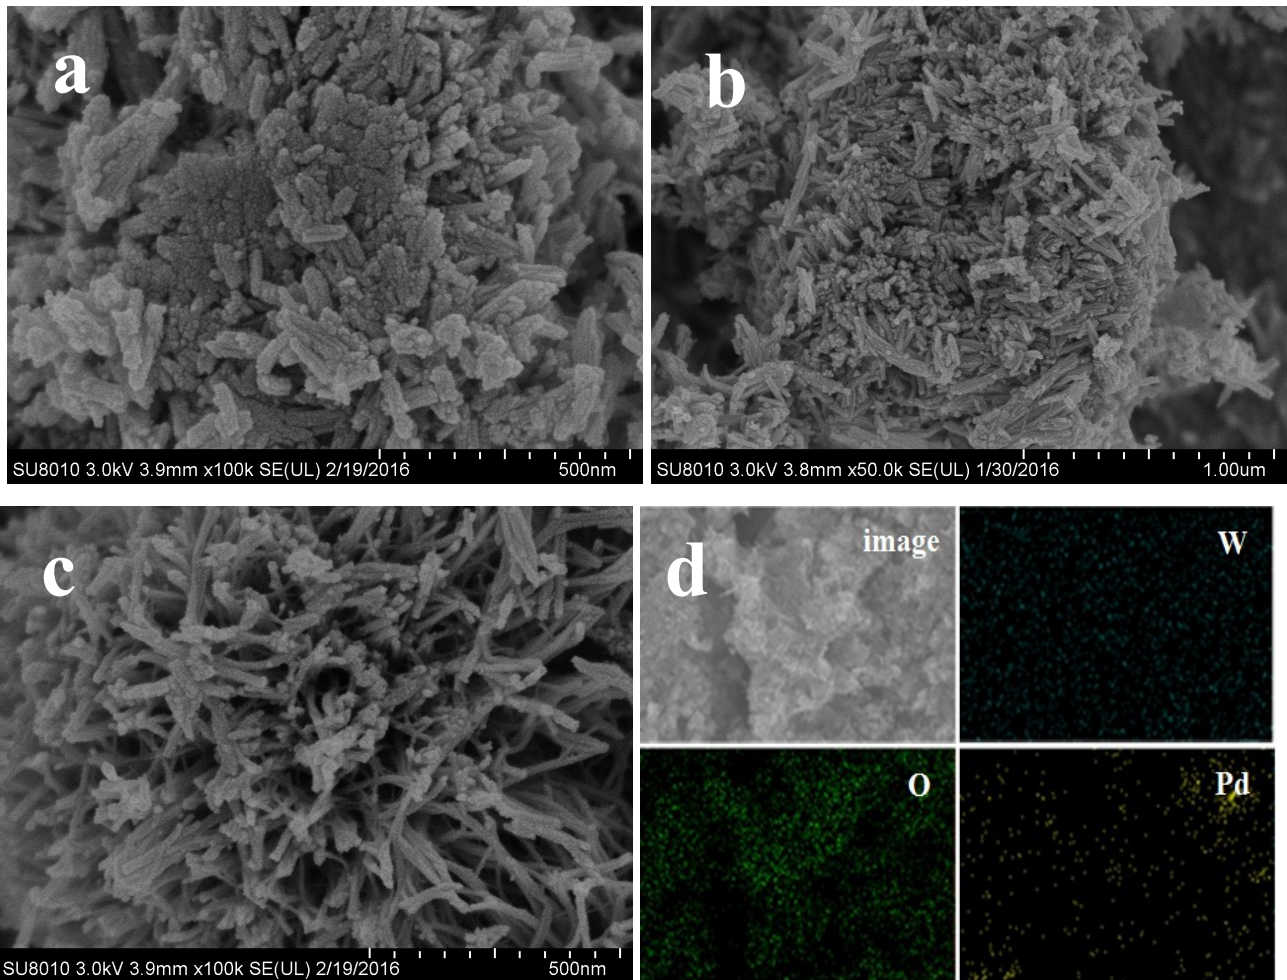

**Figure S1.** SEM images of (a) 1 at% Pd doped  $W_{18}O_{49}$  NFs, (b) 5 at% Pd doped  $W_{18}O_{49}$  NFs and (c) 10 at% Pd doped  $W_{18}O_{49}$  NFs. (d) Elemental mapping images of W, O, and Pd for 5 at% Pd doped  $W_{18}O_{49}$  NFs.



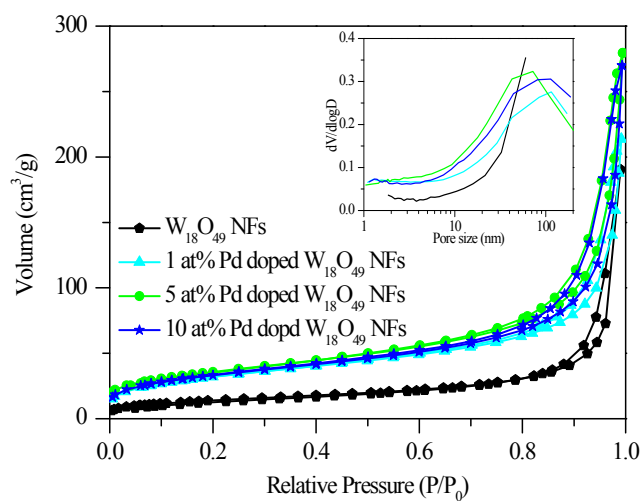

**Figure S2.** Nitrogen adsorption/desorption isotherm plots for pristine  $W_{18}O_{49}$  NFs and Pd doped  $W_{18}O_{49}$  NFs.

Figure 1d shows a closely packed 5 at% Pd doped  $W_{18}O_{49}$  NFs having heterogeneous diameters with gigantic aspect ratio. 1 at% Pd doped  $W_{18}O_{49}$  NFs (Figure S1a) tend to aggregate together while 10 at% Pd doped  $W_{18}O_{49}$  NFs tend to bundle together automatically (Figure S1b). BET characterization yields increased specific surface area of 113.9, 126.3 and 118.2  $m^2 g^{-1}$  for 1, 5 and 10 at% Pd doped  $W_{18}O_{49}$  NFs (Figure S2). Regardless of other performances, increased specific surface area for an electrocatalyst is expected to provide enhanced catalytic activity.

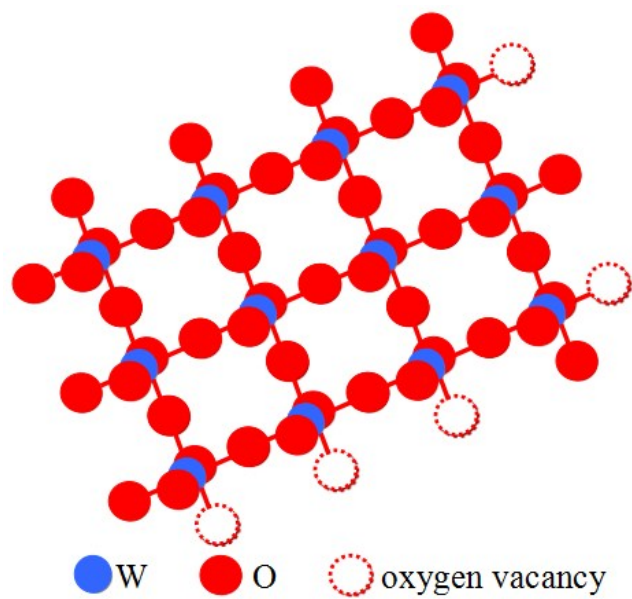

**Figure S3.** Schematic illustrating for pristine  $W_{18}O_{49}$  structure.

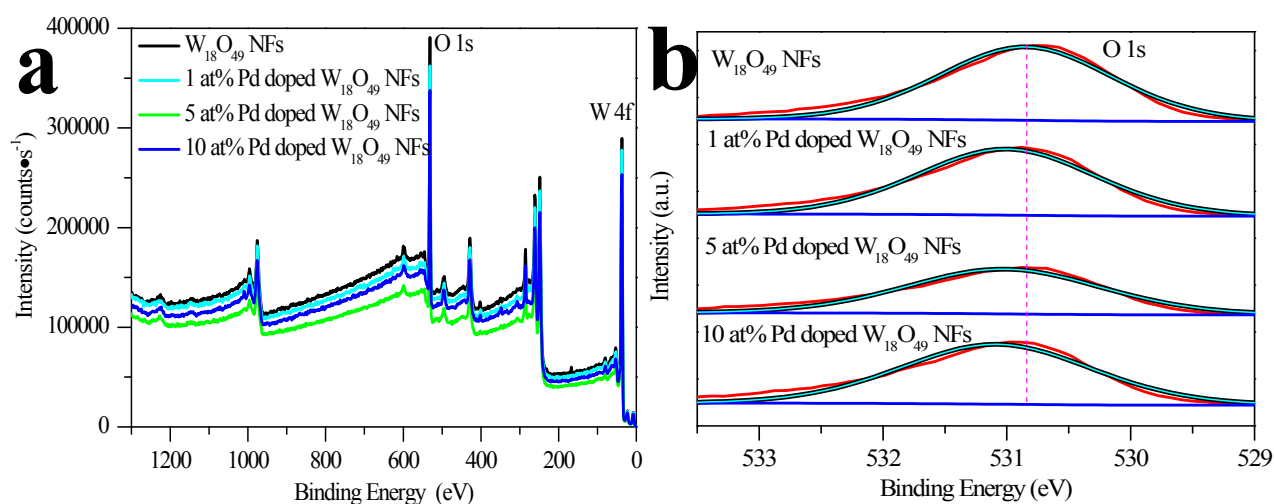

**Figure S4.** XPS spectrum: (a) survey spectrum, (b) O 1s peaks for pristine  $W_{18}O_{49}$  NFs and Pd doped  $W_{18}O_{49}$  NFs.

XPS characterizations for the chemical valence of W species yield a doublet peak for  $W4f_{5/2}$  and  $W4f_{7/2}$ . The percentages of  $W^{5+}$  states for 1, 5 and 10 at% Pd doped  $W_{18}O_{49}$  NFs are 60.76%, 63.75% and 61.58%, respectively. The O 1s peak of pure  $W_{18}O_{49}$  NFs shows a single Gaussian component centered at 530.78 eV, and the value is close to the commonly reported value of 530.6 eV (Figure 2d). The binding energies were shifted to higher values after the addition of Pd.

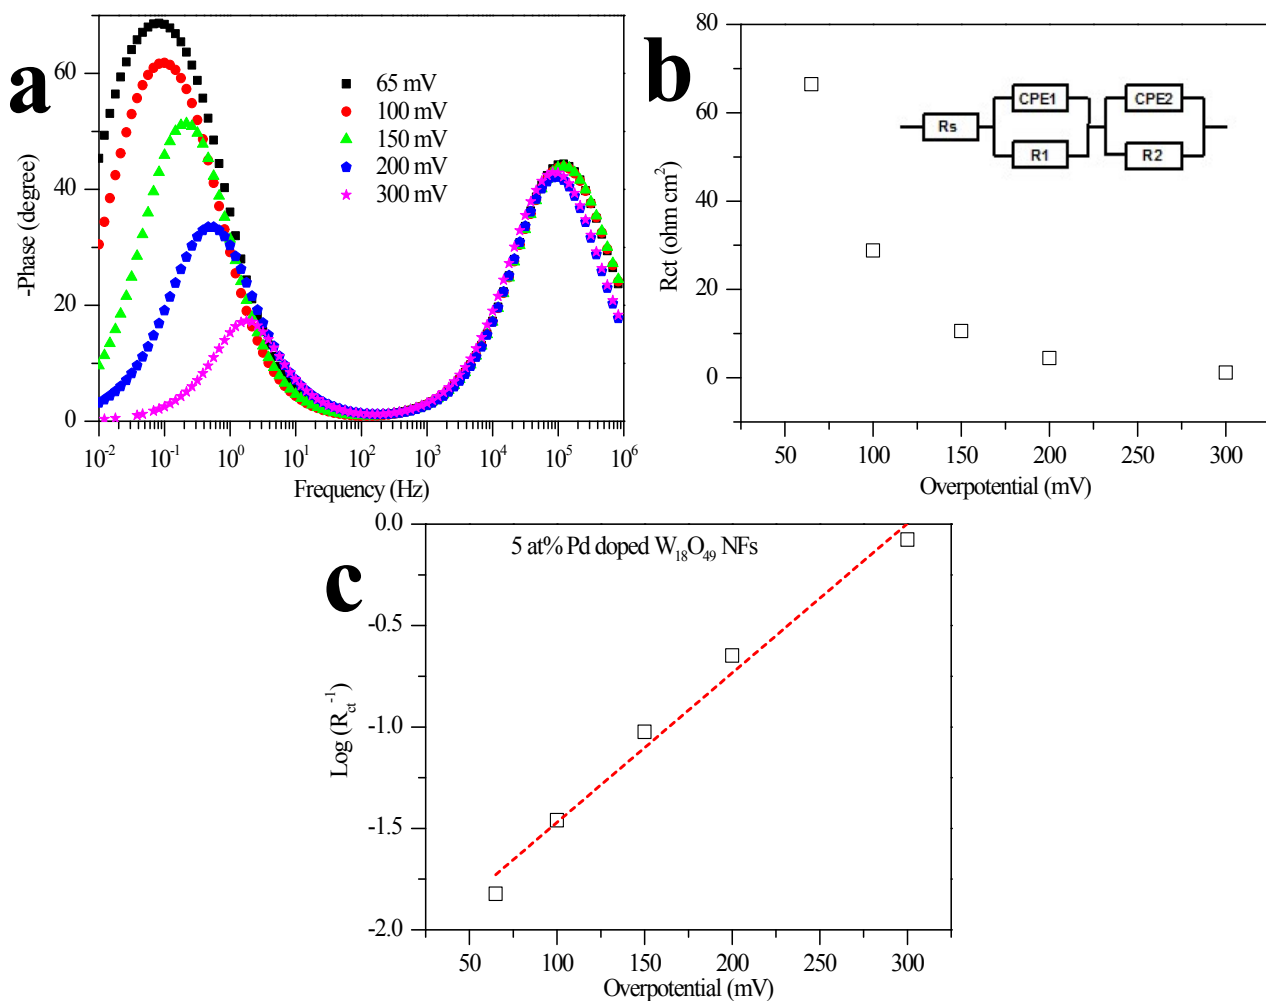

**Figure S5.** (a) Bode EIS plots, (b) The low-frequency charge-transfer resistance ( $R_{ct}$ ) and equivalent electrical circuit used to model the HER process and plots of  $\log(R_{ct}^{-1})$  as a function of overpotential for 5 at% Pd doped  $W_{18}O_{49}$  NFs recorded in 0.5 M  $H_2SO_4$  aqueous solution.

## Supporting References

- [1] Z. C. Xing, Q. Liu, A. M. Asiri and X. P. Sun, *Adv. Mater.*, 2014, **26**, 5702-5707.
- [2] L. Cheng, W. J. Huang, Q. F. Gong, C. H. Liu, Z. Liu, Y. G. Li and H. J. Dai, *Angew. Chem. Int. Ed.*, 2014, **53**, 7860 -7863.
- [3] H. L. Fei, Y. Yang, Z. W. Peng, G. D. Ruan, Q. F. Zhong, L. Li, E. L. G. Samuel and J. M. Tour, *ACS Appl. Mater. Interfaces*, 2015, **7**, 8083-8087.
- [4] J. Kibsgaard, Z. Chen, B. N. Reinecke and T. F. Jaramillo, *Nat. Mater.*, 2012, **11**, 963-969.
- [5] J. Xie, H. Zhang, S. Li, R. Wang, X. Sun, M. Zhou, J. Zhou, X. Lou and Y. Xie, *Adv. Mater.*, 2013, **25**, 5807-5813.
- [6] W. F. Chen, K. Sasaki, C. Ma, A. I. Frenkel, N. Marinkovic, J. T. Muckerman, Y. M. Zhu and R. R. Adzic, *Angew. Chem. Int. Ed.*, 2012, **51**, 6131-6135.
- [7] Z. Chen, D. Cummins, B. N. Reinecke, E. Clark, M. K. Sunkara and T. F. Jaramillo, *Nano Lett.*, 2011, **11**, 4168-4175.
- [8] X. Zhu, X. Huang, A. Goswami, R. Silva, B. R. Sathe, E. Mikmekova and T. Asefa, *Angew. Chem. Int. Ed.*, 2014, **53**, 4372-4376.
- [9] Y. Xu, R. Wu, J. Zhang, Y. Shi and B. Zhang, *Chem. Commun.*, 2013, **49**, 6656-6658.
- [10] B. Cao, G. M. Veith, J. C. Neufeind, R. R. Adzic and P. G. Khalifah, *J. Am. Chem. Soc.*, 2013, **135**, 19186-19192.
- [11] M. Li, Q. Ma, W. Zi, X. J. Liu, X. J. Zhu and S. Z. Liu, *Science Advances*, 2015, **4**, DOI: 10.1126/sciadv.1400268.
- [12] J. F. Callejas, C. G. Read, E. J. Popczun, J. M. McEnaney and R. E. Schaak, *Chem. Mater.*, 2015, **27**, 3769-3774.

- [13] Y. H. Chang, R. D. Nikam, C. T. Lin, J. K. Huang, C. C. Tseng, C. L. Hsu, C. C. Cheng, C. Y. Su, L. J. Li and D. H.C. Chua, *ACS Appl. Mater. Interfaces*, 2014, **6**, 17679-17685.
- [14] J. Q. Tian, Q. Liu, A. M. Asiri and X. P. Sun, *J. Am. Chem. Soc.*, 2014, **136**, 7587-7590.
- [15] H. Vrubel, D. Merki and X Hu, *Energy Environ. Sci.*, 2012, **5**, 6136-6144.
- [16] J. Yang, D. Voiry, S. J. Ahn, D. Kang, A. Y. Kim, M. Chhowalla and H. S. Shin, *Angew. Chem. Int. Ed.*, 2013, **52**, 13751-13754.
- [17] Y. F. Xu, M. R. Gao, Y. R. Zheng, J. Jiang and S. H. Yu, *Angew. Chem. Int. Ed.*, 2013, **52**, 8546-8550.
- [18] W. F. Chen, K. Sasaki, C. Ma, A. I. Frenkel, N. Marinkovic, J. T. Muckerman, Y. Zhu and R. R. Adzic, *Angew. Chem. Int. Ed.*, 2012, **51**, 6131-6135.
- [19] D. Merki, S. Fierro, H. Vrubel and X. Hu, *Chem. Sci.*, 2011, **2**, 1262-1267.
